# Supplementary material
Source: publisher figshare collection journal article supplement (https://sage.figshare.com/ndownloader/files/21632748)
Supplement: Supplementary file 1 [file 21632748]

## Supplementary Table 1

### Search terms and combination

| <b>SPIDER</b><br>(Cooke et al., 2012)                 | <b>Search terms*</b>                                                                                                                                                                                                                                                                                                                                                                                                                                 |
|-------------------------------------------------------|------------------------------------------------------------------------------------------------------------------------------------------------------------------------------------------------------------------------------------------------------------------------------------------------------------------------------------------------------------------------------------------------------------------------------------------------------|
| S – Sample                                            | myocardial infarction [MeSH] OR heart attack OR acute coronary syndrome [MeSH]<br>OR<br>coronary disease [MeSH] OR coronary heart disease OR coronary artery disease [MeSH]<br>OR<br>myocardial revascularization [MeSH] OR percutaneous coronary intervention [MeSH] OR angioplasty, balloon, coronary [MeSH] OR percutaneous transluminal coronary angioplasty OR fibrinolysis OR coronary artery bypass [MeSH] OR coronary artery bypass grafting |
| PI – Phenomenon of Interest                           | risk communication OR health communication [MeSH] OR risk perception OR risk interpretation OR risk framing OR risk literacy OR health literacy [MeSH] OR information literacy [MeSH]<br>OR<br>secondary prevention [MeSH]<br>OR<br>patient education [MeSH] OR health education [MeSH] OR information provision                                                                                                                                     |
| D – Design                                            | Interview                                                                                                                                                                                                                                                                                                                                                                                                                                            |
| E – Evaluation                                        | Experience                                                                                                                                                                                                                                                                                                                                                                                                                                           |
| R – Research type                                     | qualitative OR mixed method* OR findings                                                                                                                                                                                                                                                                                                                                                                                                             |
| <b>Search combination: S AND PI AND (D OR E OR R)</b> |                                                                                                                                                                                                                                                                                                                                                                                                                                                      |

\*Adaption of search terms for each database.
